# Supplementary figures and images for: Effects of a multimedia campaign on HIV self-testing and PrEP outcomes among young people in South Africa: a mixed-methods impact evaluation of ‘MTV Shuga Down South’
Source: HighWire-hosted journal article supplement (doi:10.1136/bmjgh-2021-007641), 2022-04-01

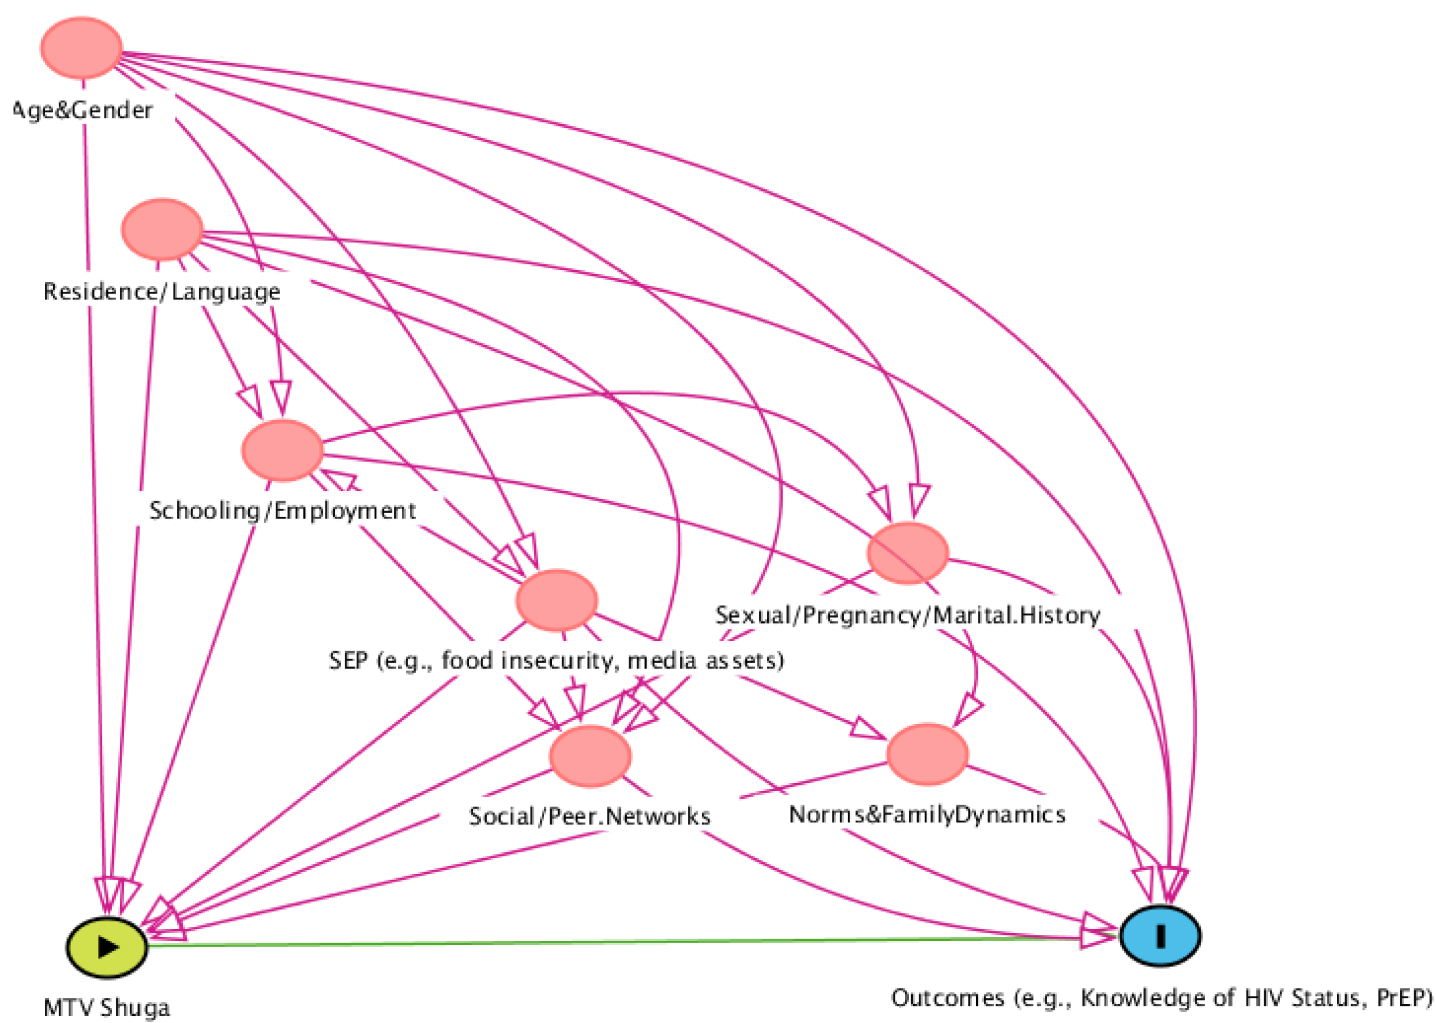

Supplement: bmjgh-2021-007641supp002_data_supplement.pdf [file bmjgh-2021-007641supp002_data_supplement.pdf]
